# Supplementary material for: Nature of the band gap and origin of the electro-/photo-activity of Co3O4
Source: Royal Society of Chemistry journal article supplement (doi:10.1039/c3tc30861h), 2013-01-01
Supplement: c3tc30861h.pdf [file c3tc30861h.pdf]

## Supplementary Information

### Nature of the band gap and origin of the electro-/photo- activity of $\text{Co}_3\text{O}_4$

L. Qiao<sup>1\*</sup>, H. Y. Xiao<sup>2</sup>, H. M. Meyer<sup>3</sup>, J. N. Sun<sup>4</sup>, C. M. Rouleau<sup>1</sup>, A. A. Puretzky<sup>1</sup>, D. B. Geohegan<sup>1</sup>, I. Ivanov<sup>1</sup>, M. Yoon<sup>1</sup>, W.J. Weber<sup>2,3</sup>, and M. D. Biegalski<sup>1\*</sup>

<sup>1</sup>Center for Nanophase Materials Sciences,  
Oak Ridge National Laboratory, Oak Ridge, TN 37831, USA

<sup>2</sup>Department of Materials Science and Engineering,  
University of Tennessee, Knoxville, TN 37996, USA

<sup>3</sup>Materials Science and Technology Division,  
Oak Ridge National Laboratory, Oak Ridge, TN 37831, USA

<sup>4</sup>J. A. Woollam Co., Inc., 645 M Street, Lincoln, NE 68508, USA

#### Film epitaxy and structural characterization

Figure 1a shows x-ray diffraction (XRD)  $\theta$ - $2\theta$  scan of a 35-nm epitaxial  $\text{Co}_3\text{O}_4(111)$  film on  $\text{Al}_2\text{O}_3(0001)$  substrate. The film exhibits (111) orientation and a fully relaxed structure due to the moderate lattice match ( $\sim 2.2\%$ ) between  $\text{Co}_3\text{O}_4[100]$  and  $\text{Al}_2\text{O}_3[\bar{1}100]$ . No other impurities, e.g. Co or CoO, are determined indicating a single-phase of the obtained epitaxial film. Notice the epitaxial  $\text{Co}_3\text{O}_4(111)$  exhibits clear thickness fringes around film (222) Bragg peak due to flat film surface and density contrast between film and substrate. The reflective high-energy electron diffraction (RHEED) image show well-defined shape spots along substrate  $[\bar{1}100]$  direction. The presence of both finite thickness fringes and shape RHEED patterns indicate the high quality of the obtained epitaxial  $\text{Co}_3\text{O}_4(111)$  films. Figure 1b is a high-resolution atomic force microscopy (AFM) image of the film surface. Clear growth-induced step-terrace structure is observed with a minimum height of  $\sim 4.6 \text{ \AA}$ , which corresponds well to the  $d$ -spacing for a  $\text{Co}_3\text{O}_4(111)$  layer.

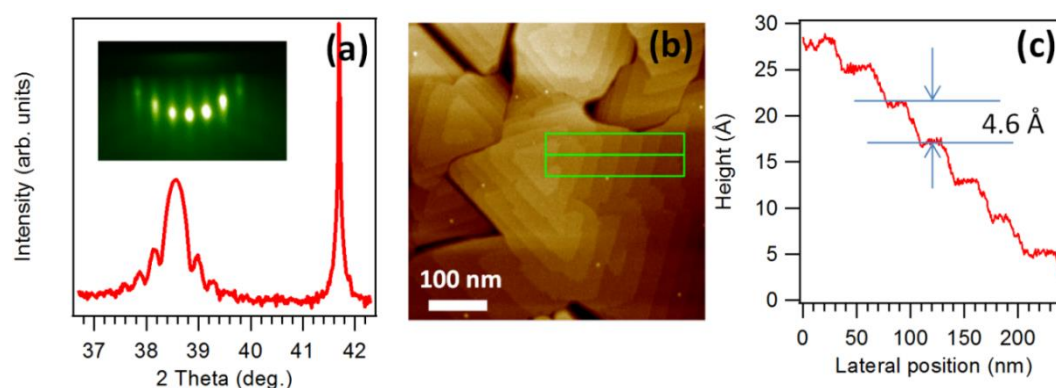

Figure 1 (a) XRD  $\theta$ - $2\theta$  scan a 35 nm epitaxial  $\text{Co}_3\text{O}_4(111)$  film on  $\text{Al}_2\text{O}_3(0001)$  substrate. Inset shows the RHEED pattern of the film along  $[\bar{1}100]$  crystallographic direction of the  $\text{Al}_2\text{O}_3$  substrate. (b) AFM image of the film surface. (c) Extracted line scan of the rectangular region in AFM image.

### Ellipsometry measurement

Figure 2 shows the determined film refractive index ( $n$ ) and extinction coefficient ( $k$ ). Overall the obtained  $k$  function mimics the absorption lineshape, e.g. asymmetric peak near 1.6 eV, a broad absorption peak near 2.8 eV, knee-like features at 3.7 eV and 4.5 eV, and a generally increasing trend in absorption for higher energies. These features also qualitatively match the reported complex dielectric function in the literature [1,2]. It is shown that the obtained  $n$  for film in the low energy range ( $< 2.5$  eV), is significantly larger than that of the  $\text{Al}_2\text{O}_3$  substrate, which approaches a constant 1.7 across the whole IR-VIS-UV range [3]. Also, the peak at 1.6 eV determined by ellipsometry is less asymmetric than the same peak in absorption spectrum. Therefore, the broad feature of peak 10 in the absorption measurements originates not from absorption, but from the index mismatches at the various interfaces based on Fresnel theory [4-6]. Similar phenomena have also been reported in other layered organic and oxide systems [7-9].

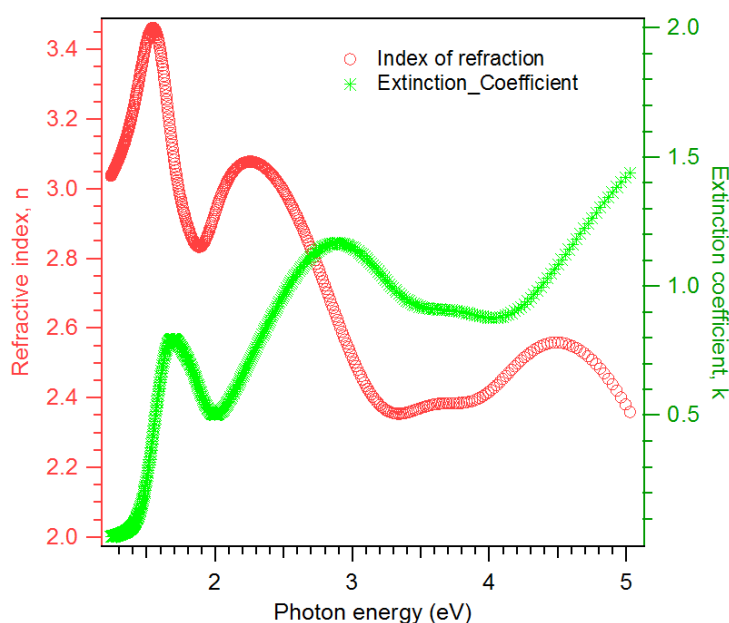

Figure 2 Determined refractive index and extinctive coefficient for epitaxial  $\text{Co}_3\text{O}_4$  film from polarized spectroscopy ellipsometry.

### Substrate choice and optical isotropy of the epitaxial film

The film orientation depends on the choice of substrate. Epitaxial  $\text{Co}_3\text{O}_4$  film exhibits (111) orientation on  $\text{Al}_2\text{O}_3(0001)$  substrates, but exhibits (001) orientation on  $\text{SrTiO}_3(001)$  and  $\text{MgO}(001)$  substrates. We show in Figure 3 the obtained optical absorption spectra for  $\text{Co}_3\text{O}_4$  films grown on different substrates, e.g. 35nm  $\text{Co}_3\text{O}_4(111)$  on  $\text{Al}_2\text{O}_3(0001)$ , 20 nm  $\text{Co}_3\text{O}_4(001)$  on  $\text{SrTiO}_3(001)$  and 20 nm  $\text{Co}_3\text{O}_4(001)$  on  $\text{MgO}(001)$  substrates, respectively. It is seen that film absorption is greatly affected by substrate band gap excitation when grown on low band gap substrate  $\text{SrTiO}_3$  (3.2 eV). Even grown on  $\text{MgO}$ , which has an intermediate band gap of 7.8 eV, the film absorption is still overlapped with that of the substrate since  $\text{MgO}$  starts to absorb far below ( $\sim 5$  eV) its nominal band gap. In this case,  $\text{Al}_2\text{O}_3$  is a good substrate choice because of its extreme large band gap ( $\sim 9$  eV), which permits isolation of the film absorption. Comparison of the absorption spectra for  $\text{Co}_3\text{O}_4(111)$  and  $\text{Co}_3\text{O}_4(001)$  reveals almost identical features, indicating an optical isotropy for this material.

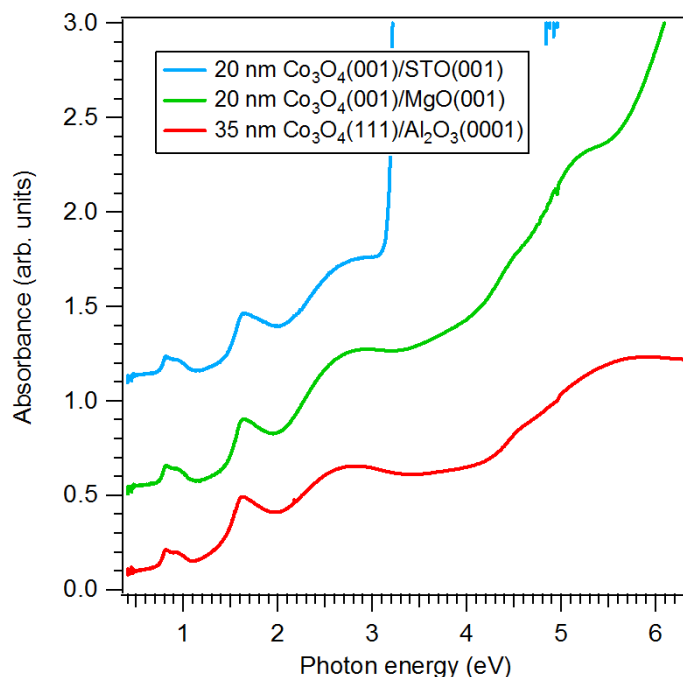

Figure 3. Room temperature optical absorption spectra for 35nm  $\text{Co}_3\text{O}_4(111)$  on  $\text{Al}_2\text{O}_3(0001)$ , 20 nm  $\text{Co}_3\text{O}_4(001)$  on  $\text{SrTiO}_3(001)$  and 20 nm  $\text{Co}_3\text{O}_4(001)$  on  $\text{MgO}(001)$  substrates.

### **Effect of Hubbard $U_{\text{eff}}$ correction on the band gap and structural properties**

We show in Figure 4a the obtained fundamental gap as a function of different  $U_{\text{eff}}$  values for both Co ions. Figure 4b shows the calculated lattice constant as a function of different Hubbard  $U$  corrections for both  $\text{Co}^{2+}$  and  $\text{Co}^{3+}$  ions. It is seen that zero  $U$  correction for both Co ions yields a lattice constant agreeing well with the experimental value, and larger  $U$  values for  $\text{Co}^{2+}$  and  $\text{Co}^{3+}$  results in increasing deviation of the lattice constant from the experimental one.

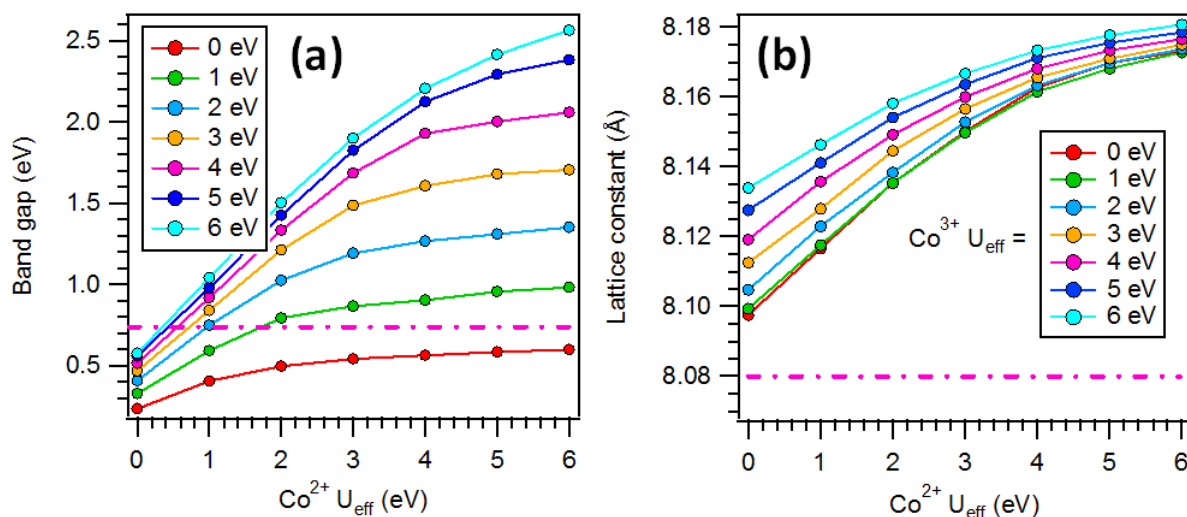

Figure 4. Calculated band gap (a) and lattice constant (b) as a function of different Hubbard  $U$  corrections for both Co ions. Dashed line is the corresponding experimental values.

- [1] T. Tanaka, Japanese J. Appl. Phys. 18, 1043 (1979).
- [2] J. W. D. Martens et al., J. Phys. Chem. Solids 46, 411 (1985).
- [3] R. H. French, H. Mullejans, and D. J. Jones, J. Am. Ceram. Soc. 81, 2549 (1998).
- [4] G. A. Boutry, Sci. Prog. 36, 587 (1948).
- [5] E. F. C. Driessen, and M. J. A. de Dood, Appl. Phys. Lett. 94, 171109 (2009).
- [6] K. Y. Chen et al., Opt. Express 18, 3238 (2010).
- [7] A. K. Ray et al., IEE Proc.-Sci. Meas. Technol. 147, 301 (2000).
- [8] G. Gaertner, and H. Greiner, in Organic Optoelectronics and Photonics Iii, edited by P. L. Heremans, M. Muccini, and E. A. Meulenkaamp (Spie-Int Soc Optical Engineering, Bellingham, 2008), pp. T9992.
- [9] P. V. Sushko et al., Phys. Rev. Lett. 110, 077401 (2013).
